# Supplementary material for: MOF-derived Fe–N–C electrocatalyst via a dual ligand strategy for efficient oxygen reduction in acidic media
Source: Royal Society of Chemistry journal article supplement (doi:10.1039/d3se01183f), 2023-01-01
Supplement: d3se01183f1.pdf [file d3se01183f1.pdf]

## Supporting Information

# **MOF-Derived Fe-N-C Electrocatalyst via a Dual Ligand Strategy for Efficient Oxygen Reduction in Acidic Media**

Yi Sheng,<sup>a</sup> Hongmei Zheng,<sup>a</sup> Jingtong Hou,<sup>a</sup> Wanying Zhang,<sup>a</sup> Hong Chen,<sup>a</sup> Luanjie Nie,<sup>b</sup> Jing Zheng,<sup>b</sup> Qingxue Lai<sup>\*a</sup>

<sup>a</sup>Jiangsu key Laboratory of Electrochemical Energy Storage Technologies, College of Materials Science and Technologies, Nanjing University of Aeronautics and Astronautics, Nanjing 210016, P. R. China

<sup>b</sup>Department of Chemistry and Materials Science, College of Science, Nanjing Forestry University, Nanjing 210037, P. R. China

\*Corresponding authors: laiqingxue@126.com (Q. Lai)

## 1. Electrochemical Measurements

All catalysts were carried out with a three-electrode system on a CHI760D electrochemical workstation with an MSR electrode rotator (Pine Research Instrumentation) at room temperature. 0.5 M H<sub>2</sub>SO<sub>4</sub> solution was prepared as the electrolyte. A graphite rod was employed as the counter electrode while a saturated calomel electrode (SCE) was used as the reference electrode, the potential (E (SCE)) of which was calibrated to reversible hydrogen electrode potential (E (RHE)) using the formula E (RHE) = E (SCE) + 0.24 + 0.0591\*pH. The working electrodes were prepared by dispersing 2.0 mg of catalyst into 1.0 ml of Nafion ethanol solution (0.05 wt.%) by sonication for 1 h to acquire the catalyst ink solution which was then dropped on the RDE and the RRDE with the catalyst loading of 0.250 mg/cm<sup>2</sup> for prepared materials, and 0.125 mg/cm<sup>2</sup> for the commercial 30% Pt/C catalyst. The CV tests on RDE were carried out in N<sub>2</sub>- or O<sub>2</sub>-saturated electrolyte with a scan rate of 10 mV/s and no rotation. LSV tests on RDE and RRDE were carried out with a scan rate of 10 mV/s and a rotation speed of 1600 rpm. The influence of the electric double layer capacitance on the LSV current was eliminated by subtracting the tested curves under N<sub>2</sub>-saturated electrolyte from O<sub>2</sub>-saturated electrolyte during data processing. The hydrogen peroxide yield and the electron transfer number were calculated from the RRDE LSV data based on the formulas below [Eqs. (1) and (2)]:

$$\text{HO}_2^- (\%) = 200 \times \frac{I_R/N}{I_R/N + I_D} \quad (1)$$

$$n = 4 \times \frac{I_D}{I_R/N + I_D} \quad (2)$$

Here, I<sub>D</sub> and I<sub>R</sub> represent the disk current and the ring current respectively, and N is the collection efficiency of the ring disk (0.37). ECSA evaluation: In the N<sub>2</sub> -saturation state, the CV test was performed in the non-Faraday interval with different scanning rates from 2 to 25 mV/s. C<sub>dl</sub> was then calculated via linear fitting of the capacitive Δj/2 (Δj=j<sub>positive</sub>-j<sub>negative</sub>) at 0.993 V vs. scan rates curve to obtain the slope.

## 2. Figures and table

**Table S1.** The Contents of different C structures for S-FeNC, D-FeNC (3:40) and D-FeNC (5:40) from Raman spectra.

| sample        | T (%) | D (%) | D'' (%) | G (%) |
|---------------|-------|-------|---------|-------|
| S-FeNC        | 15.06 | 44.92 | 15.65   | 24.37 |
| D-FeNC (3:40) | 15.71 | 43.35 | 17.90   | 23.04 |
| D-FeNC (5:40) | 15.64 | 65.61 | 6.53    | 18.72 |

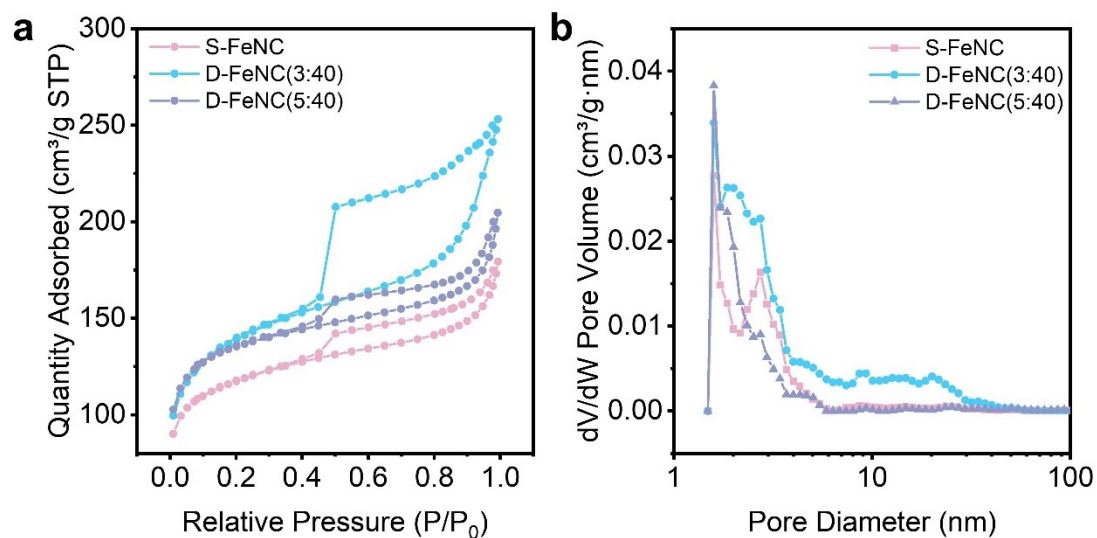

**Figure S1.** a) N<sub>2</sub> adsorption-desorption isotherm and b) corresponding pore size distribution curve of S-FeNC, D-FeNC (3:40) and D-FeNC (5:40).

**Table S2.** Comparison of BET specific surface area, micropore specific surface area, total pore volume, pore volume and average pore size.

| sample        | S                       |                           | V                          |                            | D <sub>avg</sub> (nm) |
|---------------|-------------------------|---------------------------|----------------------------|----------------------------|-----------------------|
|               | BET (m <sup>2</sup> /g) | Micro (m <sup>2</sup> /g) | total (cm <sup>3</sup> /g) | Micro (cm <sup>3</sup> /g) |                       |
| S-FeNC        | 437.36                  | 281.82                    | 0.2775                     | 0.1134                     | 4.788                 |
| D-FeNC (3:40) | 507.90                  | 309.32                    | 0.3915                     | 0.1284                     | 4.639                 |
| D-FeNC (5:40) | 506.53                  | 373.96                    | 0.3166                     | 0.1513                     | 5.402                 |

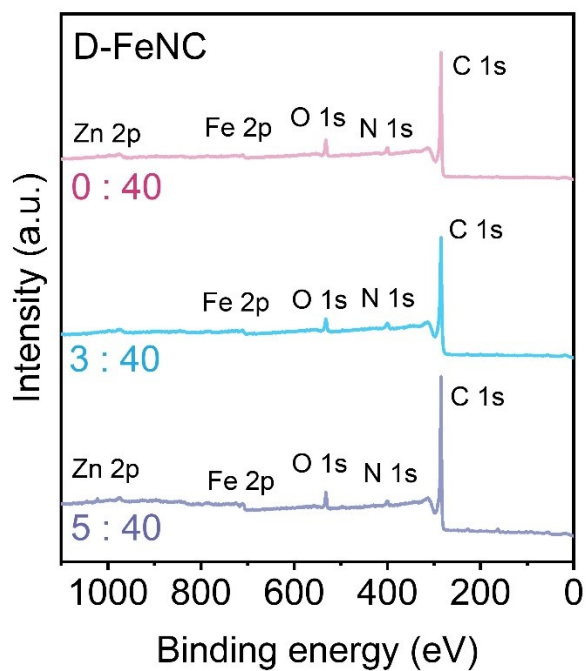

**Figure S2.** XPS spectra of S-FeNC, D-FeNC (3:40) and D-FeNC (5:40).

**Table S3.** The content of the different carbon species in the high-resolution Fe 2p XPS spectra for S-FeNC, D-FeNC (3:40) and D-FeNC (5:40).

| sample        | Fe (at.%) | Fe (II) (at.%) | Fe (III) (at.%) |
|---------------|-----------|----------------|-----------------|
| S-FeNC        | 0.88      | 0.682          | 0.198           |
| D-FeNC (3:40) | 0.85      | 0.728          | 0.122           |
| D-FeNC (5:40) | 1.49      | 1.317          | 0.173           |

**Table S4.** The content of the different carbon species in the high-resolution N 1s XPS spectra for S-FeNC, D-FeNC (3:40) and D-FeNC (5:40).

| <b>sample</b> | <b>N1 (%)</b> | <b>N2 (%)</b> | <b>N3 (%)</b> | <b>N4 (%)</b> | <b>N5 (%)</b> | <b>N6 (%)</b> |
|---------------|---------------|---------------|---------------|---------------|---------------|---------------|
| S-FeNC        | 12.36         | 19.8          | 15.65         | 22.94         | 10.69         | 4.61          |
| D-FeNC (3:40) | 23.94         | 22.95         | 6.9           | 27.63         | 11.05         | 7.53          |
| D-FeNC (5:40) | 8.45          | 19.9          | 17.73         | 29.48         | 9.32          | 15.12         |

**Table S5.** The content of the different carbon species in the high-resolution C 1s XPS spectra for S-FeNC, D-FeNC (3:40) and D-FeNC (5:40).

| <b>Sample</b> | <b>C1 (%)</b> | <b>C2 (%)</b> | <b>C3 (%)</b> | <b>C4 (%)</b> |
|---------------|---------------|---------------|---------------|---------------|
| S-FeNC        | 63.95         | 10.76         | 11.23         | 14.06         |
| D-FeNC (3:40) | 57.03         | 16.66         | 14.80         | 11.51         |
| D-FeNC (5:40) | 61.19         | 15.74         | 11.76         | 11.31         |

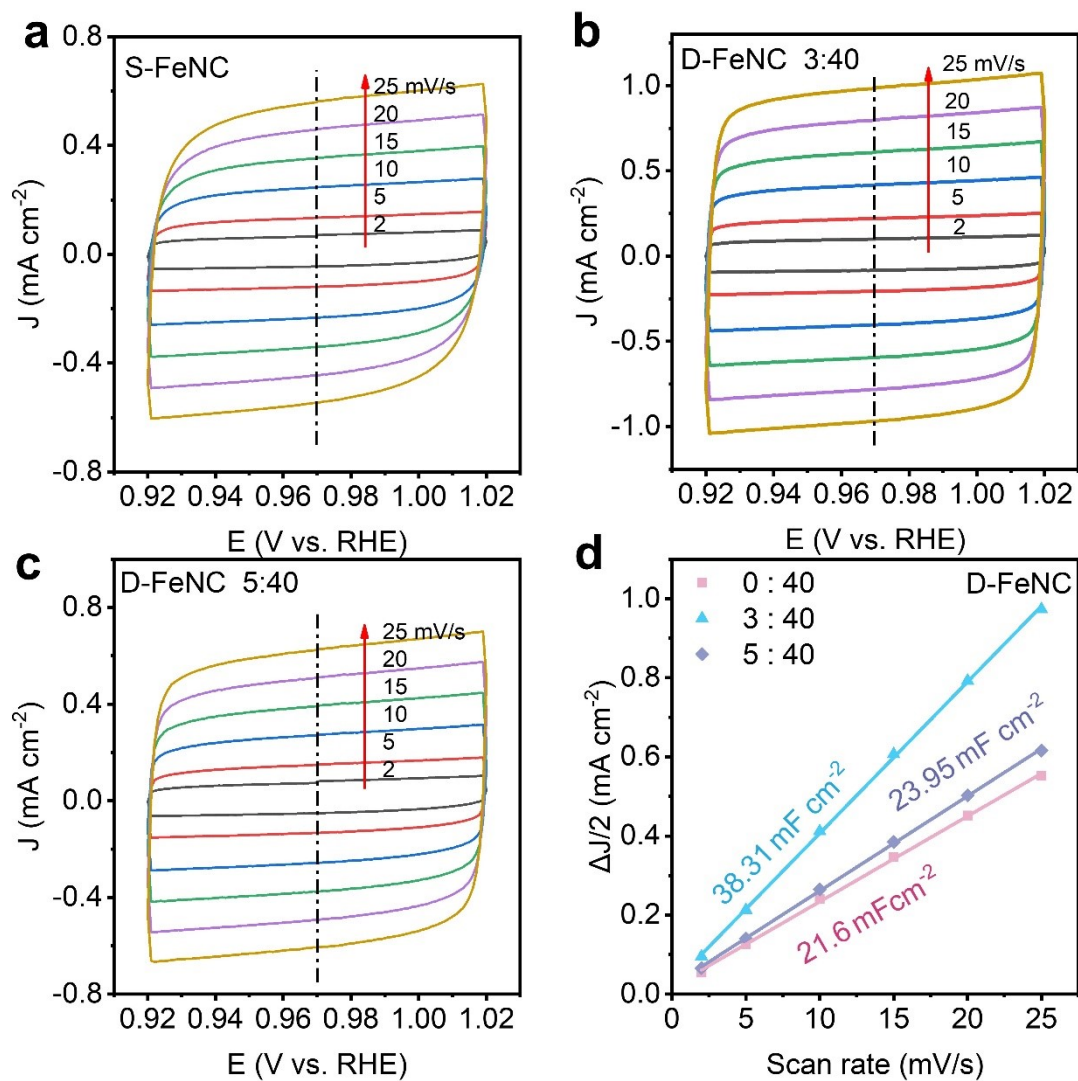

**Figure S3.** CV curves of a) S-FeNC, b) D-FeNC (3:40), c) D-FeNC (5:40) at different scanning rates. d) comparison of linear fit plots of capacitive  $\Delta j/2$  vs. scan rates for prepared D-FeNC catalysts with different ligand ratio.

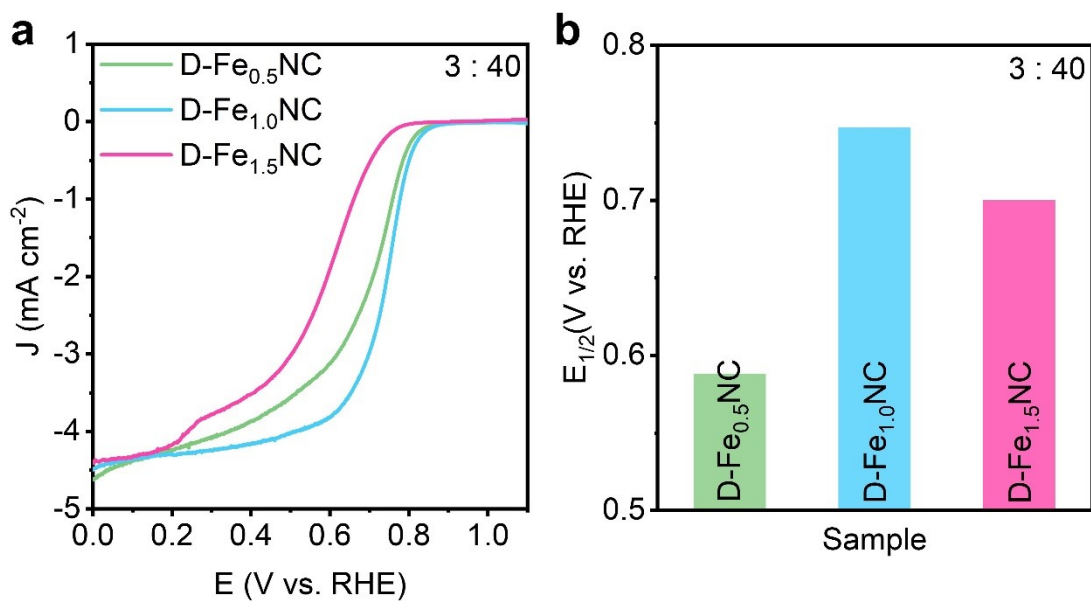

**Figure S4.** (a) LSV curves (10 mV/s, 1600 rpm). (b)  $E_{1/2}$  for D-Fe<sub>0.5</sub>NC, D-Fe<sub>1.0</sub>NC and D-Fe<sub>1.5</sub>NC.

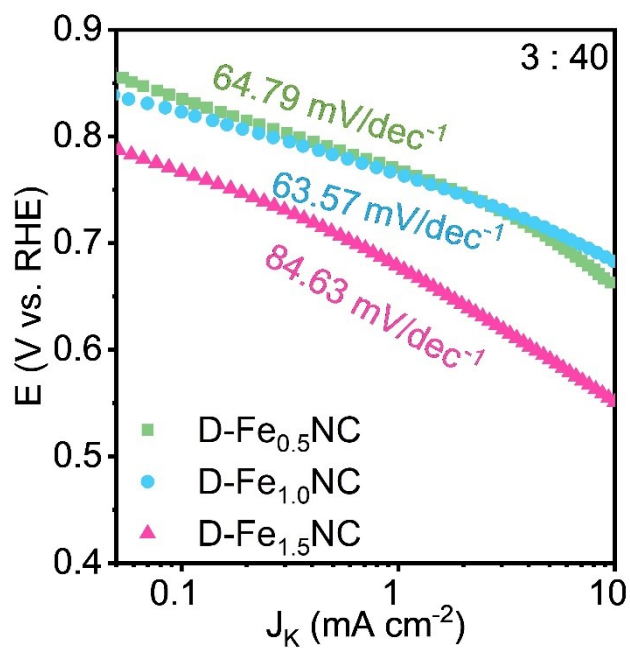

**Figure S5.** Tafel plots for D-Fe<sub>0.5</sub>NC, D-Fe<sub>1.0</sub>NC and D-Fe<sub>1.5</sub>NC.



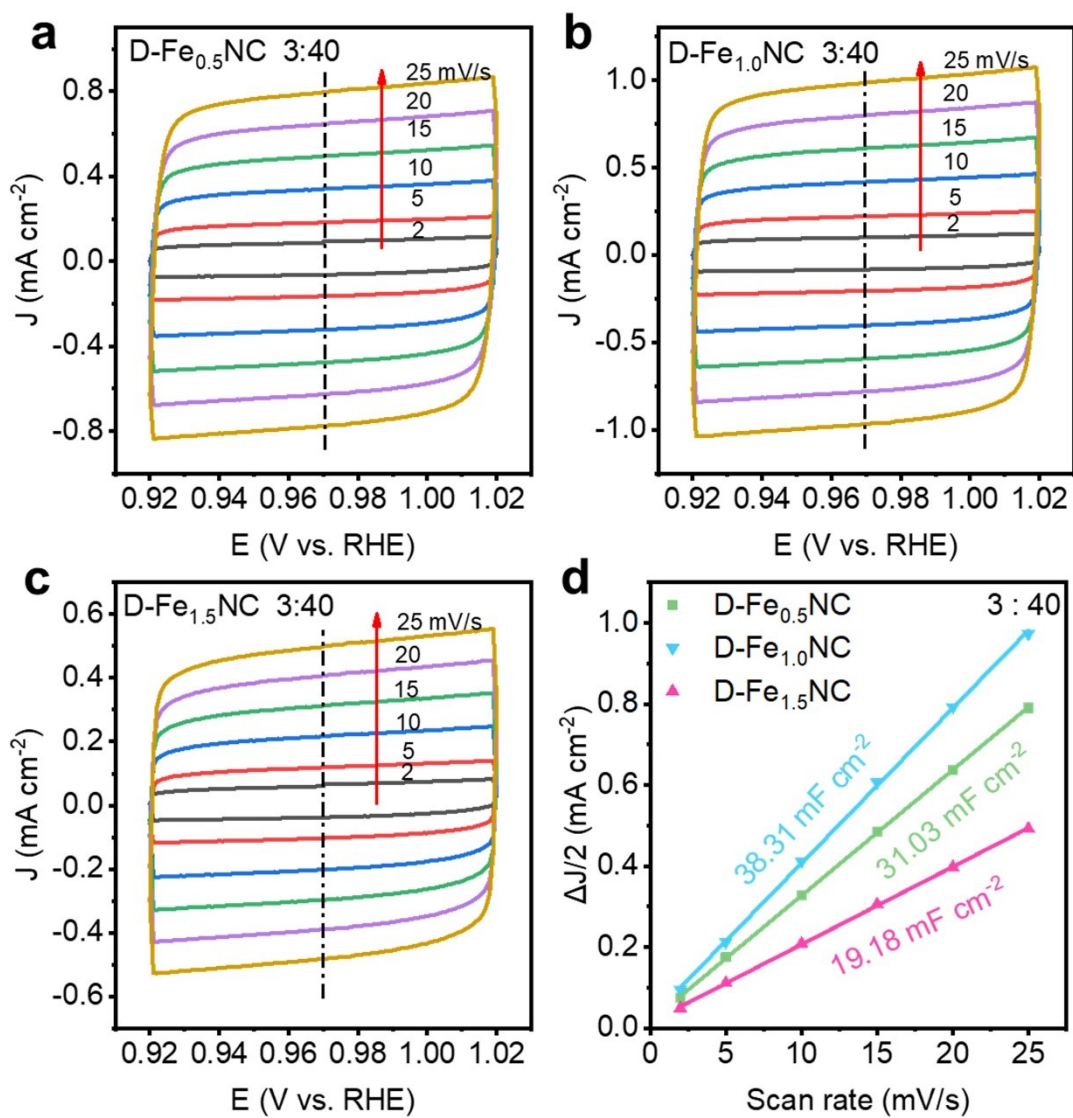

**Figure S6.** CV curves of a) D-Fe<sub>0.5</sub>NC, b) D-Fe<sub>1.0</sub>NC, c) D-Fe<sub>1.5</sub>NC at different scanning rates. d) comparison of linear fit plots of capacitive  $\Delta j/2$  vs. scan rates for prepared D-FeNC catalysts with different Zn<sup>2+</sup>/Fe<sup>2+</sup> ratio.

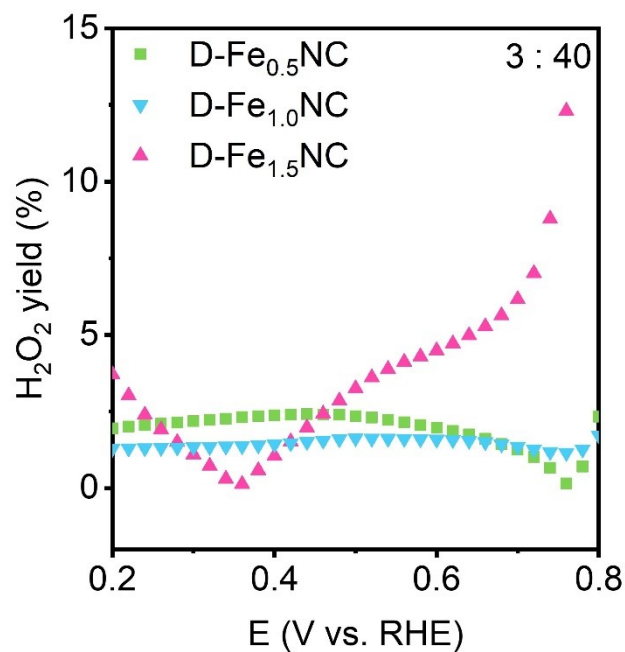

**Figure S7.** HO<sub>2</sub><sup>-</sup> yield for D-Fe<sub>0.5</sub>NC, D-Fe<sub>1.0</sub>NC and D-Fe<sub>1.5</sub>NC.

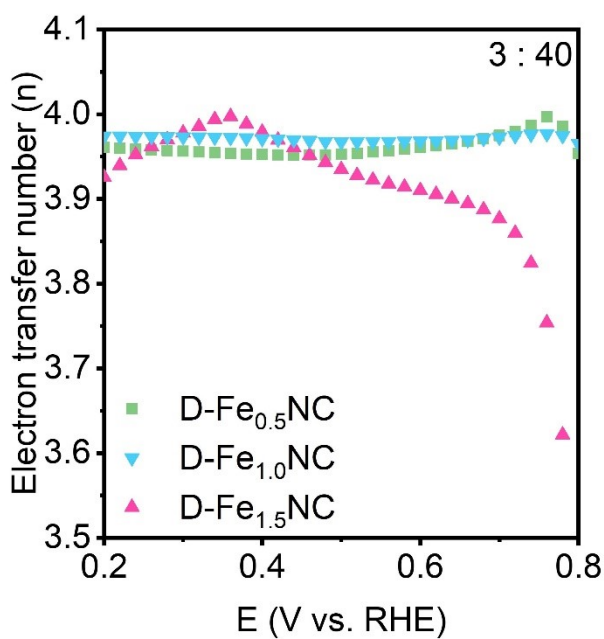

**Figure S8.** electron transfer number (n) D-Fe<sub>0.5</sub>NC, D-Fe<sub>1.0</sub>NC and D-Fe<sub>1.5</sub>NC.
